# Supplementary material
Source: PubMed Central journal article supplement (PMC6080694)
Supplement: NIHMS78790-supplement-Supplementary_Tables.pdf [file NIHMS78790-supplement-Supplementary_Tables.pdf]

**Supplementary Tables 1 and 2 for MS 201702014 published in American Journal of Nephrology 2017**

**"VALIDATION OF SURROGATES OF URINE OSMOLALITY IN POPULATION STUDIES"**

by YOUHANNA, BANKIR, JUNGERS, PORTEOUS, POLASEK, BOCHUD, HAYWARD, DEVUYST

**Supplementary Table 1 .** Results of Bland-Altman tests comparing estimated  $U_{osm}$  to measured  $U_{osm}$ .  
in the different populations

| <b>Cohort</b>    | <b>Mean of differences<br/>(mmol/L)</b> | <b>95% limit of<br/>agreement</b> |
|------------------|-----------------------------------------|-----------------------------------|
| GS:SFHS Aberdeen | - 6                                     | - 54 to 43                        |
| GS:SFHS Glasgow  | - 23                                    | - 80 to 34                        |
| CROATIA-Korcula  | 24                                      | - 44 to 90                        |
| SKIPOGH day      | 9                                       | - 71 to 89                        |
| SKIPOGH night    | 24                                      | - 66 to 114                       |
| CKD patients     | 15                                      | - 37 to 67                        |

The mean of differences corresponds to  $mU_{osm} - eU_{osm}$ .

**Supplementary Table 2.** Osmolality and its surrogates in men and women in three different cohorts

| <b>Cohort</b>           | <b>N</b> | <b>mU<sub>osm</sub></b> | <b>eU<sub>osm</sub></b> | <b>UCI</b> | <b>eU<sub>osm</sub>/ mU<sub>osm</sub></b> | <b>UCI<sub>x100</sub>/ mU<sub>osm</sub><sup>(1)</sup></b> | <b>r</b> |
|-------------------------|----------|-------------------------|-------------------------|------------|-------------------------------------------|-----------------------------------------------------------|----------|
| <b>Men</b>              |          |                         |                         |            |                                           |                                                           |          |
| <b>CROATIA-Korcula</b>  | 187      | 722 ± 13                | 697 ± 13                | 161 ± 2    | 0.97 ± 0.004                              | 21.97 ± 0.53                                              | 0.98     |
| <b>GS:SFHS Aberdeen</b> | 240      | 609 ± 16                | 615 ± 16                | 137 ± 5    | 1.01 ± 0.003                              | 21.64 ± 0.39                                              | 0.99     |
| <b>GS:SFHS Glasgow</b>  | 946      | 606 ± 8                 | 616 ± 8                 | 130 ± 3    | 1.01 ± 0.002                              | 20.67 ± 0.21                                              | 0.99     |
| <b>Women</b>            |          |                         |                         |            |                                           |                                                           |          |
| <b>CROATIA-Korcula</b>  | 264      | 627 ± 13                | 604 ± 13                | 168 ± 6    | 0.97 ± 0.003                              | 26.50 ± 0.67                                              | 0.98     |
| <b>GS:SFHS Aberdeen</b> | 312      | 450 ± 13                | 455 ± 13                | 106 ± 4    | 1.02 ± 0.003                              | 22.80 ± 0.41                                              | 0.99     |
| <b>GS:SFHS Glasgow</b>  | 1359     | 493 ± 7                 | 499 ± 7                 | 108 ± 2    | 1.01 ± 0.002                              | 20.76 ± 0.18                                              | 0.99     |
| <b>Ratio Men/Women</b>  |          |                         |                         |            |                                           |                                                           |          |
| <b>CROATIA-Korcula</b>  |          | 1.15                    | 1.15                    | 0.95       |                                           |                                                           |          |
| <b>GS:SFHS Aberdeen</b> |          | 1.35                    | 1.35                    | 1.29       |                                           |                                                           |          |
| <b>GS:SFHS Glasgow</b>  |          | 1.23                    | 1.23                    | 1.20       |                                           |                                                           |          |

mU<sub>osm</sub> in mosm/kg H<sub>2</sub>O; eU<sub>osm</sub> in mosm/L; UCI = U<sub>creatinine</sub>/P<sub>creatinine</sub>

Means ± SEM.

(1) For the ratio of UCI/mU<sub>osm</sub>. UCI was multiplied by 100 to make the reading easier.
